# Supplementary material for: Promoting the use of self-management in novice chiropractors treating individuals with spine pain: the design of a theory-based knowledge translation intervention
Source: BMC Musculoskelet Disord. 2018 Sep 11;19:328. doi: 10.1186/s12891-018-2241-1 (PMC6134709; doi:10.1186/s12891-018-2241-1)
Supplement: Supplementary file 2 — An Excel sheet that provides the raw data for clinicians and interns (XLSX 99 kb) [file 12891_2018_2241_MOESM2_ESM.xlsx]

## Sheet: CRCT_DATA6
YourParticipation	KABQ1i1	KABQ1i2	KABQ1i3	KABQ1i4	KABQ1i5	KABQ1i6	KABQ2	KABQ3a	KABQ3b	KABQ4	KABQ4other	KABQ5	KABQ5other	KABQ6	KABQ6other	KABQ7	KABQ7other	KABQ8	KABQ8other	KABQ9	KABQ10	KABQ11	KABQ12	KABQ13	KABQ14	KABQ15	KABQ16i1	KABQ16i2	KABQ16i3	KABQ16i4	KABQ16i5	KABQ16i6	KABQ16i7	KABQ16i8	KABQ16i9	KABQ16i10	KABQ16i11	KABQ16i12	KABQ16i13	KABQ16a	PABS1	PABS2	PABS3	PABS4	PABS5	PABS6	PABS7	PABS8	PABS9
Yes	Somewhat agree	Strongly agree	Moderately agree				51-75%	41283	41597	Every other day		Every month		Every week		Every week		Never		1	5	2	A lot	Moderately	Occasionally	Some															Largely disagree	Disagree to some extent	Totally disagree	Agree to some extent	Totally disagree
Yes	Moderately agree	Moderately agree	Somewhat agree				Over 75%	41283	41283	Every week		Every month		Every other day		Every month		Every other day		2	5	5	Completely	Completely	Frequently	A moderate amount															Largely disagree	Disagree to some extent	Agree to some extent	Agree to some extent	Agree to some extent
Yes	Moderately agree	Strongly agree	Moderately agree				Over 75%	41283	41597	Every other day		Never		Every week		Every week		Every month		6	10	2	A lot	Moderately	Frequently	A moderate amount															Largely agree	Largely agree	Largely agree	Largely disagree	Totally agree
Yes	Strongly agree	Strongly agree	Moderately disagree				51-75%	21-50	41283	Every day		Every month		Every week		Every month		Never		1	4	10	A lot	A lot	Frequently	A lot															Agree to some extent	Largely disagree	Agree to some extent	Totally agree	Largely agree
Yes	Moderately agree	Moderately agree	Somewhat agree				51-75%	41283	41283	Every week		Every month		Every week		Every month		Every month		2	2	1	Moderately	Somewhat	Frequently	A moderate amount															Totally disagree	Largely disagree	Agree to some extent	Disagree to some extent	Largely disagree
Yes	Strongly agree	Moderately agree	Moderately agree				Over 75%	41283	41283	Every month		Every month		Every month		Every month		Never		1	6	1	A lot	A lot	Regularly	A moderate amount															Largely disagree	Disagree to some extent	Disagree to some extent	Agree to some extent	Largely disagree
Yes	Moderately agree	Moderately agree	Somewhat agree				Over 75%	41283	41283	Every other day		Every week		Every week		Every week		Every month		2	5	5	A lot	A lot	Occasionally	A moderate amount															Agree to some extent	Disagree to some extent	Largely agree	Disagree to some extent	Agree to some extent
Yes	Somewhat agree	Strongly agree	Moderately agree				51-75%	41283	41597	Every other day		Every month		Every week		Every month		Never		0	6	6	A lot	Somewhat	Occasionally	Some															Largely disagree	Disagree to some extent	Disagree to some extent	Agree to some extent	Agree to some extent
Yes	Somewhat agree	Neutral	Strongly agree	Somewhat agree	Moderately agree	Strongly agree	Under 25%	41283	41283	Every other day		Never		Every week		Every month		Every week		2	2	2	A lot	Moderately	Frequently	Some	Somewhat agree	Somewhat agree	Neutral	Somewhat agree	Neutral	Strongly agree	Somewhat agree	Moderately agree	Moderately agree	Moderately disagree	Moderately disagree	Moderately disagree	Disagree		Agree to some extent	Agree to some extent	Agree to some extent	Largely agree	Disagree to some extent	Agree to some extent	Largely agree	Agree to some extent	Agree to some extent
Yes	Moderately agree	Moderately agree	Moderately agree	Neutral	Neutral	Strongly agree	51-75%	41283	41283	Every week		Every month		Every week		Every month		Every month		2	3	2	A lot	Moderately		Some	Somewhat disagree	Neutral	Neutral	Somewhat disagree	Somewhat agree	Moderately agree	Moderately agree	Moderately agree	Moderately agree	Neutral	Moderately disagree	Somewhat disagree	Moderately disagree		Disagree to some extent	Disagree to some extent	Disagree to some extent	Agree to some extent	Disagree to some extent	Largely disagree	Agree to some extent	Largely disagree	Agree to some extent
Yes	Moderately agree	Moderately agree	Somewhat agree	Neutral	Somewhat agree	Neutral	51-75%	41283	41597	Every other day		Every month		Every other day		Every week		Never		1	7	8	A lot	Somewhat	Frequently	Some	Moderately disagree	Somewhat agree	Neutral	Moderately disagree	Somewhat agree	Strongly agree	Neutral	Somewhat agree	Moderately agree	Neutral	Moderately disagree	Moderately disagree	Neutral		Agree to some extent	Disagree to some extent	Agree to some extent	Disagree to some extent	Agree to some extent	Agree to some extent	Largely agree	Disagree to some extent	Agree to some extent
Yes	Moderately agree	Moderately agree	Somewhat disagree	Somewhat agree	Somewhat agree	Neutral	Over 75%	41283	41597	Every other day		Never		Every week		Every month		Every month		5	5	5	A lot	A lot	Occasionally	A moderate amount	Somewhat disagree	Somewhat disagree	Somewhat agree	Neutral	Neutral	Strongly agree	Strongly agree	Strongly agree	Strongly agree	Moderately agree	Disagree	Disagree	Neutral		Agree to some extent	Agree to some extent	Agree to some extent	Disagree to some extent	Disagree to some extent	Largely disagree	Agree to some extent	Disagree to some extent	Agree to some extent
Yes	Moderately agree	Moderately agree	Somewhat disagree	Strongly agree	Strongly agree	Strongly agree	Over 75%	41283	41597	Every other day		Every week		Every other day		Every month		Never		5	3	2	A lot	A lot	Occasionally	A moderate amount	Somewhat disagree	Moderately agree	Disagree	Disagree	Somewhat disagree	Strongly agree	Moderately agree	Moderately agree	Strongly agree	Neutral	Disagree	Disagree	Disagree		Largely disagree	Largely disagree	Largely agree	Largely agree	Agree to some extent	Disagree to some extent	Agree to some extent	Largely disagree	Largely disagree
Yes	Somewhat agree	Moderately agree	Somewhat disagree	Neutral	Neutral	Moderately agree	51-75%	41283	41283	Every other day		Every month		Every week		Other (please specify)	Unknown	Other (please specify)	Unknown	1	1	1	Moderately	A lot	Occasionally	Some	Neutral	Neutral	Neutral	Neutral	Neutral	Somewhat agree	Somewhat agree	Somewhat agree	Moderately agree	Moderately agree	Somewhat disagree	Somewhat disagree	Neutral		Largely disagree	Largely disagree	Disagree to some extent	Largely disagree	Largely disagree	Disagree to some extent	Totally disagree	Totally disagree	Totally disagree
Yes	Moderately agree	Moderately agree	Somewhat agree	Moderately agree	Strongly agree	Strongly agree	Over 75%	41283	41283	Every other day		Every month		Every week		Every month		Every week		4	5	3	A lot	A lot	Regularly	A moderate amount	Somewhat agree	Somewhat agree	Moderately agree	Somewhat agree	Moderately agree	Moderately agree	Moderately agree	Moderately agree	Moderately agree	Moderately agree	Somewhat disagree	Somewhat disagree	Disagree		Largely disagree	Largely disagree	Agree to some extent	Agree to some extent	Largely agree	Largely agree	Disagree to some extent	Agree to some extent	Disagree to some extent
Yes	Moderately agree	Somewhat agree	Somewhat agree	Somewhat agree	Somewhat agree	Somewhat agree	51-75%	41283	41283	Every week		Every month		Other (please specify)	occasionally	Never		Every month		1	3	1	Moderately	Moderately	Almost never	A moderate amount	Somewhat disagree	Moderately disagree	Moderately agree	Neutral	Moderately agree	Somewhat agree	Neutral	Somewhat agree	Somewhat agree	Neutral	Somewhat disagree	Moderately disagree	Disagree		Largely disagree	Agree to some extent	Agree to some extent	Agree to some extent	Agree to some extent	Disagree to some extent	Agree to some extent	Largely agree	Disagree to some extent
Yes	Strongly agree	Strongly agree	Strongly agree	Somewhat agree	Strongly agree	Strongly agree	Over 75%	0	0	Every month		Other (please specify)	2/year	Every month		Other (please specify)	1/year	Other (please specify)	2/year	0	0	2	Completely	A lot	Almost never	A lot	Moderately disagree	Moderately agree	Neutral	Disagree	Moderately agree	Strongly agree	Moderately agree	Moderately agree	Strongly agree	Disagree	Disagree	Disagree	Disagree		Largely disagree	Largely disagree	Agree to some extent	Largely agree	Largely agree	Agree to some extent	Totally agree	Largely agree	Largely agree
Yes	Moderately agree	Moderately agree	Moderately agree	Moderately agree	Somewhat agree	Strongly agree	51-75%	41597	41283	Every other day		Every month		Every month		Every month		Every month		4	4	4	Moderately	Moderately	Frequently		Somewhat agree	Neutral	Neutral	Neutral	Neutral	Neutral	Neutral	Neutral	Neutral	Neutral	Neutral	Neutral	Neutral		Disagree to some extent	Disagree to some extent	Disagree to some extent	Agree to some extent	Agree to some extent	Disagree to some extent	Agree to some extent	Agree to some extent	Agree to some extent
Yes	Strongly agree	Moderately agree	Neutral	Neutral	Neutral	Moderately agree	51-75%	41283	41283	Every other day		Every month		Every week		Every week		Never		0	3	1	Moderately	Moderately	Occasionally	A moderate amount	Somewhat agree	Moderately agree	Neutral	Neutral	Somewhat agree	Strongly agree	Neutral	Moderately agree	Strongly agree	Neutral	Moderately disagree	Moderately disagree	Disagree		Agree to some extent	Disagree to some extent	Agree to some extent	Disagree to some extent	Disagree to some extent	Disagree to some extent	Disagree to some extent	Largely disagree	Agree to some extent
Yes	Somewhat agree	Somewhat agree	Somewhat agree	Somewhat agree	Moderately agree	Strongly agree	26-50%	41283	41597	Every week		Every month		Every month		Every month		Never		0	2	3	Moderately	Somewhat	Occasionally	Some	Somewhat agree	Somewhat disagree	Neutral	Neutral	Neutral	Moderately agree	Moderately agree	Somewhat agree	Moderately agree	Somewhat agree	Disagree	Disagree	Disagree		Disagree to some extent	Agree to some extent	Agree to some extent	Largely disagree	Largely disagree	Agree to some extent	Disagree to some extent	Agree to some extent	Agree to some extent
Yes	Somewhat agree	Moderately agree	Moderately agree	Neutral	Neutral	Moderately agree	Over 75%	41283	41283	Every week		Every month		Every week		Every week		Never		4	4	2	Moderately	Moderately	Frequently	Some	Somewhat disagree	Somewhat agree	Moderately disagree	Somewhat disagree	Neutral	Moderately agree	Somewhat agree	Moderately agree	Moderately agree	Moderately agree	Moderately disagree	Neutral	Disagree		Largely disagree	Disagree to some extent	Disagree to some extent	Agree to some extent	Disagree to some extent	Agree to some extent	Agree to some extent	Largely disagree	Disagree to some extent
Yes	Moderately agree	Moderately agree	Moderately agree	Neutral	Strongly agree	Strongly agree	51-75%	41283	41283	Every other day		Every month		Every day		Every month		Never		5	5	5	Somewhat	Moderately	Frequently	A little	Somewhat agree	Moderately agree	Neutral	Somewhat agree	Somewhat agree	Moderately agree	Moderately agree	Neutral	Somewhat agree	Somewhat agree	Moderately disagree	Somewhat disagree	Neutral		Disagree to some extent	Agree to some extent	Agree to some extent	Largely disagree	Disagree to some extent	Disagree to some extent	Agree to some extent	Largely disagree	Disagree to some extent
Yes	Somewhat agree	Strongly agree	Moderately agree	Strongly agree	Strongly agree	Strongly agree	Over 75%	41283	41597	Every week		Every month		Never		Every other day		Every week		2	7	3	A lot	Moderately	Frequently	A moderate amount	Neutral	Somewhat agree	Neutral	Somewhat disagree	Neutral	Neutral	Moderately agree	Somewhat agree	Somewhat agree	Somewhat disagree	Somewhat disagree	Somewhat disagree	Somewhat disagree		Largely disagree	Disagree to some extent	Agree to some extent	Disagree to some extent	Disagree to some extent	Disagree to some extent	Disagree to some extent	Disagree to some extent	Agree to some extent
Yes	Somewhat agree	Somewhat agree	Somewhat agree	Somewhat agree	Somewhat agree	Somewhat disagree	26-50%	41283	41283	Every week		Every other day		Every week		Other (please specify)	periodically	Every month		10	10	8	Moderately	Moderately	Occasionally	A moderate amount	Somewhat disagree	Neutral	Somewhat agree	Somewhat agree	Somewhat agree	Somewhat agree	Somewhat agree	Somewhat agree	Somewhat agree	Somewhat agree	Neutral	Somewhat agree	Neutral		Largely disagree	Disagree to some extent	Disagree to some extent	Disagree to some extent	Disagree to some extent	Disagree to some extent	Disagree to some extent	Agree to some extent	Disagree to some extent
Yes	Strongly agree	Moderately agree	Somewhat agree	Moderately agree	Strongly agree	Strongly agree	Over 75%	41283	41283	Every other day		Every month		Every week		Every month		Never		1	4	0	Completely	A lot	Frequently	A moderate amount	Neutral	Strongly agree	Disagree	Somewhat disagree	Somewhat agree	Strongly agree	Moderately agree	Strongly agree	Strongly agree	Disagree	Disagree	Disagree	Disagree		Disagree to some extent	Disagree to some extent	Agree to some extent	Agree to some extent	Totally disagree	Disagree to some extent	Disagree to some extent	Disagree to some extent	Totally disagree
Yes	Strongly agree	Moderately agree	Moderately agree	Somewhat agree	Moderately agree	Moderately agree	Over 75%	41283	41597	Every week		Every week		Every month		Every month		Other (please specify)	on occasion for LO's etc...	0	3	2	A lot	A lot	Occasionally	A moderate amount	Moderately disagree	Somewhat disagree	Somewhat agree	Moderately disagree	Somewhat agree	Moderately agree	Moderately agree	Somewhat agree	Somewhat agree	Disagree	Disagree	Somewhat agree	Somewhat disagree		Largely disagree	Disagree to some extent	Agree to some extent	Agree to some extent	Agree to some extent	Disagree to some extent	Agree to some extent	Agree to some extent	Agree to some extent
Yes	Somewhat agree	Moderately agree	Somewhat agree	Somewhat disagree	Somewhat disagree	Somewhat agree	51-75%	41597	41597	Every other day		Never		Every other day		Every week		Every month		5	5	5	A lot	A lot	Occasionally	Some	Somewhat agree	Somewhat disagree	Somewhat agree	Somewhat disagree	Somewhat agree	Somewhat agree	Somewhat agree	Moderately agree	Moderately agree	Strongly agree	Moderately disagree	Moderately disagree	Moderately disagree		Disagree to some extent	Largely disagree	Agree to some extent	Agree to some extent	Largely agree	Largely agree	Largely agree	Largely agree	Disagree to some extent
Yes	Somewhat agree	Moderately agree	Somewhat disagree	Somewhat agree	Moderately agree	Strongly agree	26-50%	41283	41597	Every week		Every month		Every other day		Every month		Every week		1	6	4	Moderately	Somewhat	Occasionally	A little	Somewhat agree	Somewhat disagree	Somewhat agree	Somewhat agree	Somewhat disagree	Moderately agree	Somewhat agree	Neutral	Somewhat agree	Somewhat disagree	Somewhat agree	Somewhat disagree	Neutral		Agree to some extent	Disagree to some extent	Disagree to some extent	Largely disagree	Largely disagree	Largely disagree	Largely disagree	Largely disagree	Largely disagree
Yes	Moderately agree	Moderately agree	Somewhat agree	Neutral	Somewhat disagree	Somewhat disagree	51-75%	41283	41283	Every week		Never		Every month		Never		Every month		1	2	2	Moderately	Moderately	Occasionally	A moderate amount	Neutral	Somewhat agree	Moderately agree	Somewhat agree	Somewhat agree	Somewhat agree	Somewhat agree	Somewhat agree	Somewhat agree	Somewhat agree	Neutral	Neutral	Neutral		Agree to some extent	Agree to some extent	Agree to some extent	Agree to some extent	Agree to some extent	Agree to some extent	Agree to some extent	Agree to some extent	Agree to some extent
Yes	Somewhat agree	Moderately agree	Moderately agree	Neutral	Neutral	Moderately agree	26-50%	41597	41597	Every week		Other (please specify)	when needed	Every week		Every week		Every week		6	4	5	Moderately	Moderately	Frequently	A moderate amount	Neutral	Somewhat disagree	Neutral	Somewhat disagree	Moderately agree	Moderately agree	Moderately agree	Moderately agree	Moderately agree	Moderately agree	Somewhat disagree	Moderately disagree	Neutral		Agree to some extent	Agree to some extent	Largely agree	Largely agree	Agree to some extent	Largely agree	Largely agree	Agree to some extent	Disagree to some extent
Yes	Somewhat agree	Somewhat disagree	Moderately agree	Somewhat disagree	Somewhat disagree	Somewhat disagree	26-50%	41283	41283	Every week		Every week		Every week		Every month		Every other day		5	5	3	A little	A little	Occasionally	Some	Strongly agree	Disagree	Neutral	Strongly agree	Moderately agree	Somewhat agree	Moderately agree	Somewhat disagree	Disagree	Strongly agree	Moderately disagree	Neutral	Neutral	I have used evidence based approaches on my patient's and yet the outcomes for the patient have not matched those found in the study. In these cases, if I research the anatomy on my own and based on my education use what would make the most sense or use a treatment protocol that has worked well for another practitioner (and which is clinical evidence rather than something from a study), the patie…	Disagree to some extent	Disagree to some extent	Agree to some extent	Disagree to some extent	Totally disagree	Disagree to some extent	Agree to some extent	Agree to some extent	Disagree to some extent
Yes	Moderately agree	Somewhat agree	Somewhat disagree	Moderately agree	Moderately agree	Neutral	26-50%	41283	21-50	Every other day		Every month		Every other day		Every month		Never		0	12	4	Moderately	Somewhat	Occasionally	Some	Neutral	Somewhat disagree	Somewhat disagree	Somewhat disagree	Somewhat agree	Somewhat agree	Somewhat agree	Neutral	Neutral	Disagree	Disagree	Disagree	Neutral		Disagree to some extent	Disagree to some extent	Largely disagree	Disagree to some extent	Largely disagree	Agree to some extent	Largely disagree	Disagree to some extent	Largely disagree
Yes	Moderately agree	Neutral	Somewhat agree	Somewhat agree	Somewhat agree	Moderately agree	51-75%	41283	41283	Every week		Every month		Every month		Never		Every month		0	3	1	Moderately	Moderately	Occasionally	A moderate amount	Moderately agree	Neutral	Somewhat agree	Moderately agree	Moderately agree	Somewhat agree	Somewhat agree	Somewhat agree	Somewhat agree	Somewhat agree	Somewhat agree	Somewhat agree	Neutral		Totally disagree	Largely disagree	Totally disagree	Largely disagree	Largely disagree	Largely disagree	Agree to some extent	Disagree to some extent	Largely disagree
Yes	Moderately agree	Strongly agree	Moderately agree	Moderately agree	Moderately agree	Strongly agree	51-75%	41283	41283	Every other day		Never		Every week		Every month		Never		3	2	1	Moderately	Moderately	Occasionally	Some	Somewhat disagree	Moderately agree	Somewhat disagree	Somewhat disagree	Neutral	Moderately agree	Strongly agree	Strongly agree	Moderately agree	Neutral	Somewhat disagree	Neutral	Neutral		Agree to some extent	Disagree to some extent	Disagree to some extent	Disagree to some extent	Disagree to some extent	Disagree to some extent	Agree to some extent	Disagree to some extent	Agree to some extent
Yes	Somewhat agree	Neutral	Somewhat agree	Moderately agree	Strongly agree	Strongly agree	51-75%	41283	41597	Every week		Every week		Every week		Every month		Every month		10	15	10	A lot	A lot	Frequently	Some	Somewhat agree	Somewhat disagree	Neutral	Somewhat agree	Somewhat disagree	Strongly agree	Somewhat agree	Moderately agree	Strongly agree	Somewhat agree	Moderately disagree	Moderately disagree	Moderately disagree		Largely disagree	Largely disagree	Disagree to some extent	Disagree to some extent	Disagree to some extent	Agree to some extent	Disagree to some extent	Disagree to some extent	Largely disagree
Yes	Moderately agree	Strongly agree	Moderately agree	Moderately agree	Strongly agree	Strongly agree	51-75%	41283	41283	Every week		Every month		Other (please specify)	occasionally	Every week		Never		1	4	4	A lot	A lot	Frequently	A moderate amount	Disagree	Neutral	Somewhat agree	Somewhat disagree	Neutral	Strongly agree	Moderately agree	Strongly agree	Moderately agree	Moderately agree	Disagree	Moderately disagree	Neutral		Agree to some extent	Totally agree	Totally agree	Agree to some extent	Largely disagree	Agree to some extent	Totally agree	Agree to some extent	Agree to some extent
Yes	Moderately agree	Strongly agree	Somewhat agree	Moderately agree	Strongly agree	Strongly agree	Over 75%	41283	41283	Every other day		Every month		Every other day		Every month		Every month		2	6	4	Completely	Completely	Frequently	Some	Moderately disagree	Moderately agree	Moderately disagree	Neutral	Somewhat disagree	Strongly agree	Strongly agree	Strongly agree	Strongly agree	Somewhat agree	Disagree	Disagree	Disagree		Largely disagree	Largely disagree	Largely disagree	Agree to some extent	Agree to some extent	Agree to some extent	Largely agree	Disagree to some extent	Largely disagree
Yes	Strongly agree	Moderately agree	Moderately agree	Somewhat agree	Strongly agree	Somewhat agree	Over 75%	41283	41283	Every week		Every month		Every week		Every month		Never		1	1	1	Completely	A lot	Regularly	A moderate amount	Somewhat disagree	Somewhat disagree	Moderately disagree	Moderately disagree	Moderately disagree	Strongly agree	Somewhat agree	Strongly agree	Strongly agree	Neutral	Disagree	Disagree	Disagree		Largely agree	Agree to some extent	Largely disagree	Totally agree	Agree to some extent	Agree to some extent	Agree to some extent	Disagree to some extent	Largely disagree
Yes	Strongly agree	Moderately agree	Moderately agree	Moderately agree	Strongly agree	Strongly agree	51-75%	41283	41597	Every week		Never		Every week		Never		Every month		0	2	0	Moderately	Moderately	Occasionally	Some	Somewhat agree	Somewhat agree	Moderately agree	Moderately agree	Moderately agree	Moderately agree	Strongly agree	Moderately agree	Strongly agree	Disagree	Moderately disagree	Moderately disagree	Neutral		Agree to some extent	Agree to some extent	Largely agree	Agree to some extent	Disagree to some extent	Largely agree	Largely agree	Totally agree	Largely disagree
Yes	Strongly agree	Moderately agree	Somewhat agree	Somewhat agree	Moderately agree	Strongly agree	Over 75%	41597	21-50	Every other day		Other (please specify)	When needed	Every week		Every month		Every month		6	6	6	A lot	Moderately	Occasionally	A moderate amount	Moderately disagree	Somewhat agree	Somewhat disagree	Moderately disagree	Neutral	Strongly agree	Moderately agree	Strongly agree	Moderately agree	Neutral	Disagree	Disagree	Disagree		Agree to some extent	Agree to some extent	Agree to some extent	Agree to some extent	Disagree to some extent	Disagree to some extent	Agree to some extent	Disagree to some extent	Disagree to some extent
Yes	Moderately agree	Strongly agree	Somewhat agree	Strongly agree	Strongly agree	Strongly agree	Over 75%	41597	21-50	Every day		Every month		Every day		Every month		Every week		2	10	4	Completely	Completely	All the time	Some	Moderately disagree	Somewhat disagree	Neutral	Moderately disagree	Moderately disagree	Strongly agree	Moderately agree	Moderately agree	Strongly agree	Moderately agree	Moderately disagree	Disagree	Disagree		Largely disagree	Largely disagree	Disagree to some extent	Largely agree	Largely disagree	Agree to some extent	Largely disagree	Disagree to some extent	Largely disagree
Yes	Somewhat agree	Moderately agree	Moderately agree	Neutral	Somewhat agree	Somewhat agree	51-75%	41283	41283	Every week		Never		Every month		Every month		Every month		1	4	0	Moderately	Moderately	Occasionally	Some	Somewhat disagree	Neutral	Somewhat agree	Somewhat disagree	Somewhat agree	Somewhat agree	Somewhat agree	Somewhat agree	Somewhat agree	Somewhat agree	Neutral	Somewhat disagree	Neutral		Disagree to some extent	Disagree to some extent	Agree to some extent	Disagree to some extent	Agree to some extent	Agree to some extent	Agree to some extent	Agree to some extent	Agree to some extent
Yes	Moderately agree	Moderately agree	Neutral	Somewhat agree	Strongly agree	Strongly agree	51-75%	41597	21-50	Every other day		Every month		Every other day		Every month		Every week		2	5	4	A lot	A lot	Frequently	A lot	Disagree	Moderately agree	Disagree	Disagree	Somewhat agree	Moderately agree	Strongly agree	Strongly agree	Strongly agree	Disagree	Disagree	Disagree	Disagree		Totally disagree	Totally disagree	Disagree to some extent	Agree to some extent	Largely disagree	Agree to some extent	Agree to some extent	Agree to some extent	Largely disagree
Yes	Moderately agree	Strongly agree	Somewhat agree	Moderately agree	Strongly agree	Strongly agree	Over 75%	41283	41283	Every day		Never		Every day		Every week		Every week		10	15	15	Completely	Completely	Regularly	A moderate amount	Somewhat disagree	Somewhat disagree	Somewhat agree	Somewhat agree	Moderately agree	Moderately agree	Strongly agree	Moderately agree	Moderately agree	Moderately agree	Moderately disagree	Moderately disagree	Disagree		Totally disagree	Totally disagree	Agree to some extent	Disagree to some extent	Largely disagree	Disagree to some extent	Disagree to some extent	Largely disagree	Totally disagree
Yes	Somewhat agree	Somewhat agree	Moderately agree	Moderately disagree	Moderately disagree	Somewhat disagree	51-75%	41283	41283	Every week		Every month		Every month		Every month		Never		0	1	0	Moderately	Somewhat	Occasionally	A moderate amount	Moderately agree	Moderately disagree	Moderately agree	Moderately agree	Neutral	Moderately agree	Moderately agree	Somewhat agree	Neutral	Moderately agree	Somewhat disagree	Somewhat disagree	Somewhat disagree		Largely disagree	Largely disagree	Largely disagree	Disagree to some extent	Totally disagree	Largely disagree	Agree to some extent	Agree to some extent	Largely disagree
Yes	Strongly agree	Moderately agree	Somewhat agree	Somewhat agree	Strongly agree	Somewhat agree	51-75%	41283	41283	Every month		Never		Every month		Never		Never		2	2	5	A lot	A lot	Frequently	A moderate amount	Disagree	Somewhat disagree	Moderately disagree	Disagree	Neutral	Moderately agree	Somewhat agree	Strongly agree	Strongly agree	Neutral	Disagree	Disagree	Somewhat agree	Clinical experience and patient preference can outweigh the evidence at times, its not often though.	Totally disagree	Totally disagree	Disagree to some extent	Agree to some extent	Disagree to some extent	Largely agree	Disagree to some extent	Totally disagree	Largely disagree
Yes	Strongly agree	Strongly agree	Moderately agree	Moderately agree	Moderately agree	Neutral	Over 75%	41283	41283	Every other day		Every month		Every week		Every week		Every month		2	3	2	A lot	A lot	Frequently	A moderate amount	Disagree	Somewhat disagree	Neutral	Moderately disagree	Neutral	Strongly agree	Moderately agree	Moderately agree	Strongly agree	Strongly agree	Disagree	Disagree	Disagree		Largely disagree	Disagree to some extent	Disagree to some extent	Agree to some extent	Disagree to some extent	Agree to some extent	Largely agree	Agree to some extent	Disagree to some extent
Yes	Moderately agree	Moderately agree	Moderately agree	Somewhat agree	Moderately agree	Strongly agree	51-75%	41597	41283	Every other day		Other (please specify)	when I cannot find it on the internet if I am searching a specific topic so it varies	Every other day		Every month		Never		4	10	0	A lot	A lot	Almost never	A little	Moderately disagree	Somewhat agree	Neutral	Somewhat disagree	Somewhat disagree	Strongly agree	Strongly agree	Somewhat agree	Strongly agree	Somewhat disagree	Moderately disagree	Moderately disagree	Moderately disagree		Largely disagree	Disagree to some extent	Agree to some extent	Agree to some extent	Disagree to some extent	Agree to some extent	Agree to some extent	Agree to some extent	Disagree to some extent
Yes	Neutral	Somewhat agree	Somewhat agree	Somewhat disagree	Moderately disagree	Strongly agree	26-50%	41283	41283	Every month		Every month		Every month		Every month		Never		1	2	0	A little	Not at all	Almost never	Some	Strongly agree	Disagree	Strongly agree	Strongly agree	Moderately agree	Somewhat agree	Moderately agree	Somewhat agree	Somewhat agree	Strongly agree	Moderately agree	Moderately agree	Somewhat agree	Some of the RCT and review will say either it does work or it doesnt work. At the end of the day, everyone responds differently , its always a normal distribution. At the same time, it really depends on skill of practictioner with their hands and way of treatment. Evidence papers never talk about exactly how things are done, nor can you really see exactly how the treatment looks like. A huge aspe…	Disagree to some extent	Disagree to some extent	Largely disagree	Totally agree	Agree to some extent	Agree to some extent	Agree to some extent	Agree to some extent	Agree to some extent
Yes	Strongly agree	Strongly agree	Moderately agree	Somewhat agree	Moderately agree	Strongly agree	51-75%	41283	41597	Every day		Never		Every week		Every week		Never		1	10	4	A lot	Moderately	Occasionally	Some	Moderately agree	Somewhat disagree	Somewhat disagree	Neutral	Somewhat agree	Somewhat agree	Moderately agree	Somewhat agree	Moderately agree	Neutral	Disagree	Somewhat disagree	Somewhat agree	I want a way to receive the up to date research papers that are being published in the chiropractic world. I am sometimes unsure of where to find them	Totally disagree	Agree to some extent	Largely agree	Largely disagree	Totally disagree	Largely disagree	Disagree to some extent	Disagree to some extent	Largely disagree
Yes	Moderately agree	Strongly agree	Somewhat agree	Moderately agree	Strongly agree	Moderately agree	Over 75%	41283	41283	Every other day		Other (please specify)	Very rarely unless an online version	Every week		Every month		Every other day		5	5	5	A lot	A lot	Regularly	Some	Somewhat disagree	Somewhat agree	Moderately disagree	Moderately disagree	Somewhat disagree	Strongly agree	Moderately agree	Moderately agree	Strongly agree	Neutral	Disagree	Disagree	Disagree		Disagree to some extent	Agree to some extent	Agree to some extent	Agree to some extent	Largely disagree	Largely disagree	Agree to some extent	Agree to some extent	Largely disagree
Yes	Moderately agree	Moderately agree	Somewhat disagree	Somewhat agree	Somewhat agree	Strongly agree	51-75%	41283	41283	Every week		Every month		Every week		Every month		Every week		2	4	2	Moderately	Somewhat	Occasionally	A little	Somewhat disagree	Somewhat disagree	Somewhat agree	Somewhat disagree	Neutral	Moderately agree	Moderately agree	Neutral	Moderately agree	Moderately agree	Neutral	Neutral	Neutral		Agree to some extent	Agree to some extent	Agree to some extent	Disagree to some extent	Largely disagree	Largely disagree	Agree to some extent	Disagree to some extent	Disagree to some extent
Yes	Somewhat disagree	Strongly disagree	Strongly agree	Moderately agree	Strongly agree	Moderately agree	26-50%	41283	41597	Every week		Every month		Every week		Every month		Never		0	1	0	Somewhat	Somewhat	Almost never	A little	Somewhat agree	Moderately disagree	Moderately disagree	Moderately disagree	Strongly agree	Somewhat agree	Somewhat agree	Neutral	Somewhat agree	Strongly agree	Strongly agree	Somewhat disagree	Neutral		Largely disagree	Agree to some extent	Largely agree	Totally agree	Disagree to some extent	Disagree to some extent	Largely disagree	Largely agree	Disagree to some extent
Yes	Strongly agree	Strongly agree	Strongly agree	Strongly agree	Strongly agree	Strongly agree	51-75%	41283	41283	Every week		Never		Every month		Every month		Every month		2	5	2	A lot	A lot	Frequently	A moderate amount	Moderately disagree	Moderately disagree	Moderately disagree	Disagree	Somewhat disagree	Moderately agree	Somewhat agree	Strongly agree	Strongly agree	Moderately agree	Disagree	Disagree	Disagree		Disagree to some extent	Disagree to some extent	Agree to some extent	Agree to some extent	Largely disagree	Largely disagree	Largely disagree	Disagree to some extent	Disagree to some extent
Yes	Moderately agree	Moderately agree	Moderately agree	Somewhat agree	Somewhat agree	Somewhat disagree	Under 25%	41283	41283	Every week		Never		Every week		Every week		Never		1	5	2	Moderately	Moderately	Almost never	Some	Somewhat disagree	Somewhat agree	Somewhat agree	Somewhat disagree	Somewhat agree	Somewhat agree	Somewhat agree	Somewhat agree	Somewhat agree	Somewhat agree	Neutral	Neutral	Neutral		Agree to some extent	Disagree to some extent	Agree to some extent	Largely agree	Disagree to some extent	Agree to some extent	Agree to some extent	Agree to some extent	Disagree to some extent
Yes	Moderately agree	Moderately agree	Moderately agree	Somewhat agree	Neutral	Moderately agree	51-75%	41283	41283	Every week		Never		Every month		Never		Every month		5	5	0	Moderately	Moderately	Occasionally	A moderate amount	Neutral	Somewhat disagree	Moderately disagree	Moderately disagree	Neutral	Moderately agree	Somewhat agree	Moderately agree	Moderately agree	Neutral	Moderately disagree	Moderately disagree	Neutral		Largely disagree	Largely disagree	Disagree to some extent	Disagree to some extent	Largely disagree	Largely disagree	Largely disagree	Largely disagree	Disagree to some extent
Yes	Moderately agree	Moderately agree	Moderately agree	Somewhat agree	Neutral	Neutral	Over 75%	41283	41283	Every week		Every month		Every week		Other (please specify)	Rarely	Every week		2	2	2	Moderately	Moderately	Frequently		Somewhat disagree	Somewhat agree	Somewhat disagree	Neutral	Somewhat agree	Somewhat agree	Somewhat agree	Somewhat agree	Somewhat agree	Neutral	Somewhat disagree	Somewhat disagree	Somewhat disagree		Agree to some extent	Agree to some extent	Agree to some extent	Agree to some extent	Disagree to some extent	Disagree to some extent	Agree to some extent	Disagree to some extent	Agree to some extent
Yes	Moderately agree	Somewhat agree	Somewhat agree	Somewhat agree	Neutral	Neutral	Over 75%	41283	41283	Every week		Other (please specify)	Every 2-3 months	Every month		Other (please specify)	Rarely	Never		0	2	2	Moderately	Moderately	Almost never	Some	Somewhat agree	Somewhat disagree	Disagree	Somewhat agree	Moderately agree	Somewhat agree	Neutral	Neutral	Somewhat agree	Neutral	Disagree	Disagree	Neutral		Largely disagree	Disagree to some extent	Agree to some extent	Largely disagree	Largely disagree	Largely disagree	Largely disagree	Disagree to some extent	Disagree to some extent
Yes	Moderately agree	Somewhat agree	Somewhat agree	Neutral	Moderately agree	Moderately agree	Over 75%	41283	41283	Every week		Never		Every month		Every month		Never		1	2	1	A lot	A lot	Occasionally	Some	Moderately disagree	Somewhat agree	Somewhat disagree	Neutral	Neutral	Moderately agree	Moderately agree	Somewhat agree	Moderately agree	Neutral	Moderately disagree	Moderately disagree	Moderately disagree		Agree to some extent	Agree to some extent	Agree to some extent	Largely agree	Agree to some extent	Disagree to some extent	Agree to some extent	Agree to some extent	Disagree to some extent
Yes	Strongly agree	Strongly agree	Moderately agree	Strongly agree	Strongly agree	Strongly agree	51-75%	41283	41283	Every other day		Every other day		Every week		Every other day		Every other day		5	5	3	A lot	Moderately	Frequently	A moderate amount	Somewhat agree	Somewhat agree	Neutral	Somewhat disagree	Moderately agree	Moderately agree	Moderately agree	Moderately agree	Moderately agree	Moderately agree	Moderately disagree	Moderately disagree	Moderately disagree		Largely disagree	Agree to some extent	Agree to some extent	Largely agree	Disagree to some extent	Agree to some extent	Agree to some extent	Disagree to some extent	Disagree to some extent
Yes	Moderately agree	Moderately agree	Moderately agree	Moderately agree	Somewhat agree	Moderately agree	Over 75%	41283	41597	Every day		Every month		Every week		Every week		Never		5	5	5	A lot	A lot	Regularly	Some	Somewhat agree	Somewhat agree	Somewhat disagree	Somewhat disagree	Neutral	Moderately agree	Somewhat agree	Neutral	Moderately agree	Moderately agree	Disagree	Neutral	Neutral		Agree to some extent	Agree to some extent	Agree to some extent	Disagree to some extent	Disagree to some extent	Agree to some extent	Agree to some extent	Agree to some extent	Agree to some extent
Yes	Strongly agree	Moderately agree	Somewhat agree	Moderately agree	Moderately agree	Strongly agree	51-75%	41283	41283	Every other day		Every month		Every month		Every week		Every week		2	10	10	A lot	Moderately	Occasionally	A little	Neutral	Moderately disagree	Disagree	Somewhat disagree	Moderately agree	Strongly agree	Strongly agree	Moderately agree	Strongly agree	Moderately agree	Disagree	Disagree	Disagree		Totally disagree	Totally disagree	Totally disagree	Agree to some extent	Largely disagree	Largely agree	Largely agree	Totally disagree	Disagree to some extent
Yes	Strongly agree	Moderately agree	Moderately agree	Moderately agree	Moderately agree	Strongly agree	Over 75%	41283	41597	Every other day		Never		Every other day		Every month		Every day		3	3	3	A lot	A lot	Frequently	A moderate amount	Somewhat agree	Moderately agree	Moderately disagree	Somewhat disagree	Somewhat disagree	Somewhat agree	Somewhat agree	Moderately agree	Strongly agree	Moderately agree	Disagree	Somewhat disagree	Moderately disagree		Disagree to some extent	Disagree to some extent	Disagree to some extent	Agree to some extent	Largely agree	Totally agree	Largely agree	Disagree to some extent	Disagree to some extent
Yes	Strongly agree	Strongly agree	Moderately agree	Strongly agree	Strongly agree	Strongly agree	51-75%	41283	41283	Every day		Never		Every day									Moderately	Somewhat	Frequently	Some	Moderately agree	Somewhat agree	Moderately disagree	Somewhat agree	Somewhat agree	Moderately agree	Neutral	Neutral	Somewhat agree	Neutral	Moderately disagree	Moderately disagree	Moderately disagree		Disagree to some extent	Largely disagree	Largely disagree	Disagree to some extent	Largely disagree	Largely disagree	Disagree to some extent	Disagree to some extent	Agree to some extent
Yes	Moderately agree	Moderately agree	Neutral	Somewhat agree	Moderately agree	Somewhat agree	51-75%	41283	41597	Every other day		Every month		Every other day		Every month		Every month		1	3	5	A lot	Moderately	Regularly	A lot	Disagree	Somewhat agree	Moderately disagree	Moderately disagree	Neutral	Strongly agree	Somewhat agree	Moderately agree	Strongly agree	Somewhat disagree	Disagree	Moderately disagree	Neutral		Agree to some extent	Agree to some extent	Disagree to some extent	Agree to some extent	Disagree to some extent	Largely agree	Agree to some extent	Disagree to some extent	Disagree to some extent
Yes	Moderately agree	Moderately agree	Somewhat agree	Moderately agree	Strongly agree	Strongly agree	51-75%	41283	41283	Every other day		Every other day		Every week		Every month		Every month		6	2	1	A lot	A lot	All the time	A moderate amount	Somewhat disagree	Moderately disagree	Neutral	Neutral	Somewhat disagree	Moderately agree	Somewhat agree	Moderately agree	Strongly agree	Moderately disagree	Moderately disagree	Disagree	Disagree		Totally disagree	Disagree to some extent	Disagree to some extent	Largely agree	Largely disagree	Disagree to some extent	Largely agree	Largely agree	Largely disagree
Yes	Somewhat agree	Moderately agree	Moderately agree	Somewhat agree	Somewhat agree	Somewhat agree	26-50%	41597	41283	Every month		Never		Never		Never		Every month		5	5	5	Moderately	Somewhat	Occasionally	Some	Moderately disagree	Neutral	Moderately agree	Somewhat disagree	Strongly agree	Moderately agree	Somewhat agree	Somewhat agree	Somewhat agree	Moderately agree	Somewhat agree	Moderately disagree	Neutral		Agree to some extent	Largely agree	Disagree to some extent	Largely agree	Totally disagree	Disagree to some extent	Agree to some extent	Disagree to some extent	Largely disagree
Yes	Moderately agree	Somewhat agree	Moderately disagree	Moderately agree	Moderately agree	Strongly agree	Over 75%	41283	41597	Every day		Every other day		Every other day		Every other day		Every other day		1	8	3	A lot	A lot	Frequently	A moderate amount	Moderately agree	Moderately agree	Moderately disagree	Moderately disagree	Somewhat disagree	Strongly agree	Moderately agree	Moderately agree	Moderately agree	Moderately agree	Disagree	Disagree	Disagree		Largely disagree	Largely disagree	Largely disagree	Largely disagree	Largely disagree	Agree to some extent	Agree to some extent	Largely disagree	Largely disagree
Yes	Moderately agree	Moderately agree	Somewhat agree	Somewhat agree	Somewhat agree	Somewhat agree	26-50%	41597	41283	Every day		Every month		Every month		Every month		Every month		2	4	4	A lot	Moderately	Occasionally	A moderate amount	Somewhat agree	Somewhat agree	Neutral	Somewhat agree	Somewhat agree	Moderately agree	Somewhat agree	Moderately agree	Moderately agree	Neutral	Somewhat disagree	Somewhat disagree	Neutral		Disagree to some extent	Agree to some extent	Agree to some extent	Agree to some extent	Largely disagree	Agree to some extent	Agree to some extent	Agree to some extent	Agree to some extent
Yes	Moderately agree	Somewhat agree	Somewhat agree	Moderately agree	Moderately agree	Moderately agree	51-75%	41597	21-50	Every day		Every month		Every day		Every month		Every week		3	5	5	Completely	Completely	All the time	A moderate amount	Moderately disagree	Strongly agree	Somewhat agree	Moderately disagree	Moderately agree	Strongly agree	Moderately agree	Strongly agree	Strongly agree	Moderately disagree	Moderately disagree	Moderately disagree	Moderately disagree		Totally disagree	Totally disagree	Totally disagree	Largely disagree	Agree to some extent	Largely disagree	Largely disagree	Largely disagree	Totally disagree
Yes	Neutral	Neutral	Neutral	Neutral	Somewhat disagree	Somewhat agree	51-75%	41283	41283	Every month		Every month		Every month		Never		Every month		1	1	1	Somewhat	Somewhat	Occasionally		Moderately agree	Neutral	Neutral	Somewhat agree	Moderately agree	Neutral	Neutral	Neutral	Neutral	Somewhat disagree	Neutral	Neutral	Neutral		Largely disagree	Disagree to some extent	Largely disagree	Disagree to some extent	Disagree to some extent	Disagree to some extent	Disagree to some extent	Disagree to some extent	Disagree to some extent
Yes	Strongly agree	Moderately agree	Somewhat disagree	Moderately agree	Strongly agree	Strongly agree	26-50%	41283	41597	Every other day		Every month		Every other day		Every week		Never		2	4	2	Moderately	Moderately	Regularly	A moderate amount	Somewhat disagree	Somewhat agree	Neutral	Somewhat disagree	Moderately agree	Moderately agree	Somewhat agree	Moderately agree	Moderately agree	Somewhat disagree	Moderately disagree	Moderately disagree	Disagree		Largely disagree	Largely disagree	Agree to some extent	Disagree to some extent	Largely agree	Disagree to some extent	Agree to some extent	Agree to some extent	Largely disagree
Yes	Moderately agree	Moderately agree	Moderately agree	Strongly agree	Strongly agree	Strongly agree	Over 75%	41597	41597	Every week		Never		Every month		Every week		Never		2	2	2	A lot	A lot	Occasionally	Some	Somewhat disagree	Somewhat agree	Moderately disagree	Moderately disagree	Neutral	Somewhat agree	Moderately agree	Moderately agree	Moderately agree	Neutral	Disagree	Disagree	Disagree		Disagree to some extent	Disagree to some extent	Agree to some extent	Agree to some extent	Largely disagree	Totally disagree	Largely disagree	Largely disagree	Disagree to some extent
Yes	Moderately agree	Moderately agree	Somewhat agree	Moderately agree	Moderately agree	Moderately agree	51-75%	41283	41283	Every day		Every week		Every day		Every month		Every other day		1	4	1	A lot	A lot	Frequently	Some	Neutral	Somewhat agree	Somewhat disagree	Somewhat disagree	Neutral	Moderately agree	Moderately agree	Somewhat agree	Somewhat agree	Somewhat agree	Moderately disagree	Moderately disagree	Moderately disagree		Agree to some extent	Disagree to some extent	Disagree to some extent	Agree to some extent	Largely disagree	Agree to some extent	Disagree to some extent	Agree to some extent	Disagree to some extent
Yes	Moderately disagree	Strongly agree	Moderately agree	Strongly agree	Strongly agree	Strongly agree	26-50%	41597	21-50	Every week		Every month		Every week		Other (please specify)	Rarely	Never		0	1	2	Moderately	Somewhat	Occasionally	Some	Moderately disagree	Moderately disagree	Moderately agree	Disagree	Somewhat disagree	Strongly agree	Moderately agree	Somewhat agree	Strongly agree	Strongly agree	Somewhat agree	Somewhat agree	Neutral		Totally disagree	Largely disagree	Agree to some extent	Totally agree	Disagree to some extent	Largely agree	Largely agree	Largely disagree	Totally disagree
Yes	Moderately agree	Somewhat agree	Somewhat agree	Somewhat agree	Neutral	Strongly agree	26-50%	41283	41597	Every other day		Every other day		Every month		Never		Every month		1	4	1	Moderately	Somewhat	Occasionally	A little	Neutral	Somewhat disagree	Somewhat agree	Neutral	Moderately agree	Somewhat agree	Moderately agree	Neutral	Somewhat agree	Neutral	Somewhat disagree	Neutral	Neutral		Agree to some extent	Agree to some extent	Agree to some extent	Largely agree	Disagree to some extent	Disagree to some extent	Agree to some extent	Disagree to some extent	Disagree to some extent
Yes	Moderately agree	Moderately agree	Strongly disagree	Strongly agree	Moderately agree	Strongly agree	51-75%	41283	21-50	Every day		Every week		Every week		Every week		Every week		2	4	0	A lot	Somewhat	Regularly	A little	Disagree	Somewhat agree	Neutral	Moderately disagree	Moderately disagree	Strongly agree	Moderately agree	Moderately agree	Strongly agree	Disagree	Somewhat agree	Disagree	Disagree		Disagree to some extent	Agree to some extent	Agree to some extent	Agree to some extent	Largely agree	Disagree to some extent	Largely disagree	Totally disagree	Largely agree
Yes	Moderately agree	Strongly agree	Somewhat agree	Moderately agree	Moderately agree	Moderately agree	Over 75%	41283	41597	Every other day		Other (please specify)	once every few months	Every week		Every month		Every month		0	5	10	Moderately	A lot		A moderate amount	Neutral	Somewhat agree	Somewhat disagree	Somewhat disagree	Somewhat agree	Strongly agree	Moderately agree	Moderately agree	Strongly agree	Moderately agree	Somewhat disagree	Disagree	Disagree		Totally disagree	Agree to some extent	Largely agree	Largely agree	Agree to some extent	Agree to some extent	Largely agree	Largely disagree	Disagree to some extent
Yes	Strongly agree	Moderately agree	Somewhat agree	Somewhat agree	Strongly agree	Strongly agree	Over 75%	41283	41283	Every week		Other (please specify)	Seldom	Every other day		Every month		Every month		0	4	4	A lot	A lot	Regularly	A moderate amount	Disagree	Somewhat agree	Moderately disagree	Somewhat disagree	Somewhat agree	Strongly agree	Somewhat agree	Somewhat agree	Moderately agree	Somewhat disagree	Disagree	Disagree	Disagree		Totally disagree	Largely disagree	Agree to some extent	Largely disagree	Disagree to some extent	Largely disagree	Largely disagree	Largely disagree	Largely disagree
Yes	Moderately agree	Moderately agree	Moderately agree	Somewhat agree	Moderately agree	Moderately agree	Over 75%	21-50	21-50	Every day		Every week		Every day		Every day		Never		3	10	5	A lot	Moderately	Occasionally	Some	Moderately agree	Somewhat disagree	Somewhat agree	Neutral	Neutral	Somewhat agree	Moderately agree	Somewhat agree	Neutral	Neutral	Neutral	Neutral	Neutral		Disagree to some extent	Disagree to some extent	Disagree to some extent	Agree to some extent	Agree to some extent	Agree to some extent	Agree to some extent	Disagree to some extent	Disagree to some extent
Yes	Moderately agree	Moderately agree	Moderately agree	Moderately agree	Somewhat agree	Moderately agree	51-75%	41283	41283	Every week		Every month		Every week		Every week		Every week		1	6	8	A lot	A lot	Regularly	A moderate amount	Moderately disagree	Somewhat agree	Moderately disagree	Moderately disagree	Somewhat disagree	Strongly agree	Moderately agree	Moderately agree	Strongly agree	Somewhat agree	Disagree	Disagree	Disagree		Agree to some extent	Agree to some extent	Agree to some extent	Disagree to some extent	Disagree to some extent	Agree to some extent	Disagree to some extent	Disagree to some extent	Disagree to some extent
Yes	Moderately agree	Strongly agree	Moderately agree	Somewhat agree	Moderately agree	Moderately agree	51-75%	41283	41283	Every other day		Never		Every other day		Every week		Every month		0	4	2	A lot	Moderately	Frequently	A moderate amount	Somewhat disagree	Somewhat agree	Somewhat disagree	Somewhat disagree	Moderately agree	Strongly agree	Somewhat agree	Strongly agree	Strongly agree	Somewhat disagree	Moderately disagree	Somewhat disagree	Disagree		Agree to some extent	Disagree to some extent	Agree to some extent	Disagree to some extent	Agree to some extent	Agree to some extent	Agree to some extent	Disagree to some extent	Disagree to some extent
Yes	Strongly agree	Moderately agree	Strongly agree	Somewhat agree	Somewhat agree	Somewhat agree	26-50%	41283	41283	Every week		Never		Every month		Every week		Every week		1	3	1	Moderately	Somewhat	Frequently	A lot	Moderately agree	Somewhat agree	Somewhat disagree	Neutral	Somewhat agree	Somewhat agree	Moderately agree	Moderately agree	Somewhat agree	Neutral	Disagree	Disagree	Neutral		Largely disagree	Disagree to some extent	Agree to some extent	Largely agree	Disagree to some extent	Disagree to some extent	Largely agree	Disagree to some extent	Agree to some extent
Yes	Moderately agree	Moderately agree	Somewhat agree	Moderately agree	Moderately agree	Moderately agree	Over 75%	41283	41597	Every week		Every month		Every month		Other (please specify)	Couple times a year	Other (please specify)	Couple times a month	2	2	1	Moderately	Somewhat	Occasionally	A lot	Moderately agree	Moderately disagree	Disagree	Moderately agree	Somewhat disagree	Moderately agree	Somewhat agree	Somewhat agree	Moderately agree	Neutral	Moderately disagree	Moderately disagree	Neutral		Largely disagree	Largely disagree	Largely disagree	Totally disagree	Disagree to some extent	Disagree to some extent	Disagree to some extent	Agree to some extent	Disagree to some extent
Yes	Moderately agree	Moderately agree	Somewhat agree	Moderately agree	Moderately agree	Moderately agree	51-75%	41283	41283	Every week		Every week		Every month		Every month		Every month		2	2	2	Moderately	Moderately	Frequently	Some	Moderately agree	Neutral	Neutral	Neutral	Somewhat agree	Neutral	Somewhat agree	Somewhat agree	Moderately agree	Somewhat agree	Somewhat disagree	Somewhat disagree	Somewhat disagree	NA	Agree to some extent	Largely agree	Largely agree	Largely agree	Agree to some extent	Largely agree	Largely agree	Largely agree	Largely agree
Yes	Somewhat agree	Somewhat agree	Neutral	Somewhat agree	Somewhat agree	Somewhat agree	51-75%	41283	41283	Every week		Never		Every week		Every month		Every month		1	1	1	Moderately	Somewhat	Occasionally	A little	Moderately agree	Neutral	Somewhat agree	Neutral	Neutral	Somewhat agree	Neutral	Somewhat agree	Neutral	Neutral	Neutral	Somewhat disagree	Somewhat disagree		Agree to some extent	Disagree to some extent	Disagree to some extent	Agree to some extent	Agree to some extent	Largely agree	Agree to some extent	Agree to some extent	Disagree to some extent
Yes	Moderately agree	Moderately agree	Somewhat agree	Neutral	Neutral	Neutral	51-75%	41283	41283	Every week		Every month		Never		Every month		Every month		1	1	1	Somewhat	A little	Occasionally	Some	Somewhat disagree	Somewhat disagree	Moderately disagree	Moderately disagree	Moderately agree	Somewhat agree	Neutral	Somewhat agree	Somewhat agree	Somewhat disagree	Moderately disagree	Moderately disagree	Moderately disagree		Agree to some extent	Agree to some extent	Largely agree	Agree to some extent	Disagree to some extent	Disagree to some extent	Disagree to some extent	Largely disagree	Disagree to some extent
Yes	Moderately agree	Moderately agree	Moderately agree	Moderately agree	Moderately agree	Moderately agree	51-75%	41283	41597	Every week		Every week		Every week		Every week		Every week		2	7	5	Moderately	Moderately	Frequently	A moderate amount	Somewhat agree	Moderately disagree	Somewhat agree	Somewhat agree	Moderately agree	Moderately agree	Moderately agree	Moderately agree	Moderately agree	Moderately agree	Neutral	Somewhat agree	Neutral		Agree to some extent	Agree to some extent	Agree to some extent	Agree to some extent	Disagree to some extent	Disagree to some extent	Agree to some extent	Agree to some extent	Agree to some extent
Yes	Moderately agree	Strongly agree	Somewhat agree	Moderately agree	Strongly agree	Strongly agree	51-75%	41283	41597	Every day		Every week		Every month		Every other day		Never		0	10	10	A lot	Moderately	Occasionally	A moderate amount	Somewhat disagree	Neutral	Somewhat disagree	Moderately disagree	Neutral	Moderately agree	Somewhat agree	Somewhat agree	Moderately agree	Disagree	Moderately disagree	Somewhat disagree	Disagree		Agree to some extent	Agree to some extent	Agree to some extent	Largely agree	Largely disagree	Largely disagree	Largely agree	Largely disagree	Largely disagree
Yes	Strongly agree	Strongly agree	Strongly agree	Somewhat agree	Strongly agree	Strongly agree	26-50%	0	41283	Every week		Never		Every week		Every month		Never		1	1	1	Moderately	Moderately	Almost never	A lot	Disagree	Somewhat agree	Neutral	Moderately disagree	Moderately agree	Strongly agree	Strongly agree	Moderately agree	Moderately agree	Disagree	Somewhat disagree	Disagree	Disagree		Totally disagree	Agree to some extent	Disagree to some extent	Totally agree	Totally disagree	Largely disagree	Largely agree	Largely agree	Totally disagree
Yes	Neutral	Somewhat disagree	Strongly agree	Somewhat disagree	Moderately disagree	Moderately agree	51-75%	41283	41597	Every month		Other (please specify)	Rarely, only if what I am looking for cannot be found online	Other (please specify)	When needed	Never		Never		1	2	0	Somewhat	Somewhat	Occasionally	A moderate amount	Moderately agree	Somewhat disagree	Somewhat agree	Somewhat agree	Moderately agree	Somewhat disagree	Neutral	Neutral	Moderately disagree	Moderately disagree	Somewhat agree	Somewhat agree	Disagree		Disagree to some extent	Agree to some extent	Largely agree	Disagree to some extent	Largely disagree	Disagree to some extent	Disagree to some extent	Disagree to some extent	Disagree to some extent
Yes	Somewhat agree	Somewhat agree	Strongly disagree	Somewhat agree	Somewhat agree	Moderately agree	51-75%	41283	41283	Other (please specify)	whenever necessary 1-4 X/ mth	Other (please specify)	whenever necessary 1-4X/ mth	Other (please specify)	infrequently as necessary	Other (please specify)				1	2	2	Moderately	Moderately	Frequently	A moderate amount	Moderately disagree	Moderately agree	Neutral	Moderately disagree	Disagree	Moderately agree	Neutral	Somewhat agree	Disagree	Disagree	Moderately disagree	Disagree	Moderately disagree		Agree to some extent	Largely disagree	Disagree to some extent	Largely agree	Totally agree	Largely disagree	Largely disagree	Largely disagree	Totally disagree
Yes	Moderately agree	Somewhat agree	Neutral	Strongly agree	Strongly agree	Strongly agree	Over 75%	41283	41283	Every other day		Other (please specify)	I have a few go to textbook resources that have not been provided in our curriculum	Every week		Every month		Every week		6	6	6	A lot	Moderately	Frequently	A moderate amount	Somewhat agree	Moderately agree	Disagree	Disagree	Moderately disagree	Moderately agree	Moderately agree	Moderately agree	Moderately agree	Disagree	Disagree	Disagree	Moderately disagree		Largely disagree	Totally disagree	Agree to some extent	Disagree to some extent	Totally disagree	Disagree to some extent	Agree to some extent	Agree to some extent	Totally disagree
Yes	Moderately agree	Moderately agree	Somewhat agree	Moderately agree	Moderately agree	Moderately agree	51-75%	41283	41283	Every other day		Other (please specify)	once every few months	Every week		Every month		Never		1	1	2	Moderately	Somewhat	Occasionally	Some	Somewhat agree	Neutral	Somewhat disagree	Somewhat agree	Somewhat agree	Strongly agree	Moderately agree	Moderately agree	Moderately agree	Moderately agree	Somewhat disagree	Somewhat disagree	Neutral		Agree to some extent	Agree to some extent	Agree to some extent	Largely agree	Disagree to some extent	Largely disagree	Agree to some extent	Largely disagree	Largely disagree
Yes	Moderately agree	Somewhat agree	Somewhat agree	Strongly agree	Moderately agree	Moderately agree	51-75%	41597	41283	Every other day		Every month		Every week		Every month		Every other day		5	6	8	Moderately	Somewhat	Regularly	Some	Somewhat agree	Neutral	Neutral	Neutral	Neutral	Neutral	Neutral	Neutral	Neutral	Neutral	Neutral	Neutral	Neutral		Agree to some extent	Agree to some extent	Agree to some extent	Agree to some extent	Agree to some extent	Agree to some extent	Agree to some extent	Agree to some extent	Agree to some extent
Yes	Moderately agree	Moderately agree	Moderately agree	Somewhat agree	Moderately agree	Strongly agree	Over 75%	0	41283	Every week		Never		Every week		Every week		Every month		0	4	4	Completely	A lot	Occasionally	A lot	Somewhat agree	Moderately agree	Somewhat agree	Somewhat agree	Somewhat disagree	Moderately agree	Moderately agree	Moderately agree	Strongly agree	Somewhat disagree	Disagree	Disagree	Disagree		Disagree to some extent	Largely disagree	Agree to some extent	Agree to some extent	Agree to some extent	Disagree to some extent	Disagree to some extent	Agree to some extent	Disagree to some extent
Yes	Moderately agree	Moderately agree	Somewhat agree	Somewhat agree	Somewhat agree	Somewhat agree	51-75%	41283	41283	Every other day		Every week		Every week		Every week		Every week		2	5	5	Moderately	Moderately	Frequently	A lot	Disagree	Disagree	Somewhat agree	Somewhat disagree	Moderately agree	Neutral	Somewhat agree	Somewhat agree	Neutral	Neutral	Somewhat disagree	Neutral	Neutral		Totally disagree	Totally disagree	Totally disagree	Totally disagree	Totally disagree	Largely disagree	Agree to some extent	Disagree to some extent	Totally disagree
Yes	Moderately agree	Moderately agree	Moderately agree	Somewhat agree	Somewhat agree	Strongly agree	51-75%	41283	41283	Every other day		Every other day		Every other day		Every week		Every week		2	4	2	A lot	Moderately	Occasionally	A moderate amount	Somewhat disagree	Neutral	Neutral	Somewhat disagree	Neutral	Somewhat agree	Somewhat agree	Somewhat agree	Somewhat agree	Somewhat disagree	Somewhat disagree	Somewhat disagree	Neutral		Largely agree	Agree to some extent	Largely agree	Largely disagree	Disagree to some extent	Disagree to some extent	Largely agree	Disagree to some extent	Disagree to some extent
Yes	Moderately agree	Moderately agree	Moderately agree	Neutral	Neutral	Somewhat agree	Over 75%	41283	41283	Every week		Every month		Every month		Every month		Every week		2	2	2	Moderately	Moderately	Regularly	A moderate amount	Neutral	Neutral	Somewhat disagree	Somewhat disagree	Somewhat agree	Somewhat agree	Somewhat agree	Somewhat agree	Somewhat agree	Somewhat agree	Moderately disagree	Moderately disagree	Moderately disagree		Largely disagree	Agree to some extent	Agree to some extent	Agree to some extent	Largely agree	Disagree to some extent	Agree to some extent	Agree to some extent	Disagree to some extent
Yes	Somewhat agree	Moderately agree	Moderately agree	Moderately agree	Moderately agree	Somewhat agree	51-75%	41283	41597	Every week		Never		Every month		Never		Every week		3	6	6	Moderately	Moderately	Frequently	Some	Moderately disagree	Somewhat agree	Moderately agree	Somewhat disagree	Somewhat agree	Moderately agree	Neutral	Somewhat agree	Moderately agree	Somewhat agree	Moderately disagree	Somewhat agree	Disagree		Agree to some extent	Largely agree	Agree to some extent	Agree to some extent	Disagree to some extent	Disagree to some extent	Agree to some extent	Agree to some extent	Largely disagree
Yes	Strongly agree	Strongly agree	Somewhat agree	Strongly agree	Strongly agree	Strongly agree	51-75%	41283	21-50	Every day		Never		Every day		Every month		Never		14	7	7	A lot	A lot	Frequently	A moderate amount	Somewhat disagree	Neutral	Somewhat agree	Disagree	Neutral	Strongly agree	Somewhat agree	Strongly agree	Strongly agree	Neutral	Disagree	Disagree	Disagree		Largely disagree	Agree to some extent	Agree to some extent	Largely agree	Largely disagree	Largely agree	Largely agree	Agree to some extent	Disagree to some extent
Yes	Moderately agree	Somewhat agree	Moderately agree	Moderately agree	Moderately agree	Moderately agree	Over 75%	41283	41283	Every day		Every month		Every day		Every week		Every month		1	10	3	A lot	Moderately	Frequently	A moderate amount	Somewhat disagree	Somewhat agree	Somewhat agree	Somewhat disagree	Neutral	Moderately agree	Neutral	Somewhat agree	Moderately agree	Somewhat disagree	Somewhat disagree	Somewhat disagree	Neutral		Disagree to some extent	Disagree to some extent	Agree to some extent	Disagree to some extent	Disagree to some extent	Disagree to some extent	Largely disagree	Disagree to some extent	Disagree to some extent
Yes	Strongly agree	Moderately agree	Somewhat disagree	Strongly agree	Moderately agree	Moderately disagree	51-75%	41283	41283	Every week		Other (please specify)	Every 2-3 months	Every other day		Every month		Never		1	6	3	A lot	Moderately	All the time	A moderate amount	Somewhat agree	Somewhat agree	Somewhat agree	Somewhat agree	Moderately disagree	Strongly agree	Strongly agree	Moderately agree	Strongly agree	Somewhat disagree	Moderately disagree	Disagree	Disagree		Largely disagree	Disagree to some extent	Disagree to some extent	Totally disagree	Largely disagree	Agree to some extent	Totally disagree	Agree to some extent	Largely disagree
Yes	Moderately agree	Strongly agree	Neutral	Neutral	Moderately agree	Strongly agree	26-50%	41283	41283	Every week		Never		Every week		Every month		Never		1	1	1	Moderately	Moderately	Frequently	A moderate amount	Disagree	Somewhat disagree	Somewhat agree	Somewhat disagree	Somewhat agree	Somewhat agree	Somewhat agree	Somewhat agree	Somewhat agree	Disagree	Moderately agree	Somewhat agree	Neutral		Largely disagree	Disagree to some extent	Agree to some extent	Disagree to some extent	Disagree to some extent	Largely disagree	Largely disagree	Disagree to some extent	Disagree to some extent
Yes	Somewhat agree	Somewhat agree	Neutral	Somewhat agree	Moderately agree	Moderately agree	51-75%	41283	41597	Every other day		Every month		Every week		Every other day		Every month		1	5	3	A lot	Moderately	Occasionally	A little	Somewhat agree	Somewhat agree	Somewhat agree	Somewhat agree	Moderately agree	Moderately agree	Somewhat agree	Neutral	Moderately agree	Neutral	Somewhat disagree	Moderately disagree	Disagree		Totally disagree	Largely disagree	Largely disagree	Disagree to some extent	Agree to some extent	Agree to some extent	Agree to some extent	Largely disagree	Largely disagree
Yes	Strongly agree	Strongly agree	Somewhat agree	Strongly agree	Strongly agree	Strongly agree	Over 75%	41283	41283	Every day		Every day		Every week		Every week		Never		0	5	5	A lot	A lot	Frequently	A moderate amount	Disagree	Strongly agree	Disagree	Disagree	Disagree	Strongly agree	Disagree	Strongly agree	Disagree	Neutral	Disagree	Disagree	Disagree		Totally disagree	Totally disagree	Totally disagree	Disagree to some extent	Totally disagree	Totally disagree	Totally agree	Totally disagree	Totally disagree
Yes	Moderately agree	Somewhat agree	Moderately agree	Strongly agree	Strongly agree	Moderately agree	Over 75%	41283	41283	Every week		Every week		Every week		Every month		Never		3	3	0	A lot	Moderately	Occasionally	Some	Somewhat disagree	Somewhat disagree	Moderately disagree	Disagree	Neutral	Strongly agree	Moderately agree	Somewhat agree	Strongly agree	Disagree	Disagree	Disagree	Disagree		Largely disagree	Largely disagree	Agree to some extent	Disagree to some extent	Disagree to some extent	Largely disagree	Disagree to some extent	Largely disagree	Totally disagree
Yes	Strongly agree	Strongly agree	Somewhat agree	Neutral	Strongly agree	Somewhat disagree	51-75%	41283	21-50	Every other day		Never		Every other day		Other (please specify)	3-4 times per year	Never		3	3	2	A lot	Moderately	Frequently	A moderate amount	Disagree	Somewhat disagree	Moderately disagree	Disagree	Somewhat disagree	Strongly agree	Strongly agree	Moderately agree	Moderately agree	Disagree	Disagree	Disagree	Disagree		Totally disagree	Totally disagree	Totally disagree	Agree to some extent	Agree to some extent	Largely disagree	Agree to some extent	Largely agree	Agree to some extent
Yes	Moderately agree	Moderately agree	Somewhat disagree	Strongly agree	Strongly agree	Strongly agree	Over 75%	21-50	21-50	Every day		Every month		Every day		Every month		Every week		1	5	5	A lot	Completely	All the time	A lot	Moderately disagree	Strongly agree	Moderately disagree	Moderately disagree	Moderately disagree	Strongly agree	Somewhat disagree	Strongly agree	Strongly agree	Disagree	Disagree	Disagree	Neutral		Totally disagree	Totally disagree	Totally disagree	Totally disagree	Largely disagree	Totally disagree	Largely disagree	Largely agree	Totally disagree
Yes	Somewhat agree	Somewhat agree	Somewhat agree	Strongly agree	Strongly agree	Strongly agree	Over 75%	41283	41597	Every week		Every month		Every week		Every month		Never		1	4	3	A lot	A lot	Occasionally		Neutral	Somewhat agree	Neutral	Somewhat disagree	Neutral	Moderately agree	Somewhat agree	Somewhat agree	Moderately agree	Moderately agree	Somewhat agree	Moderately disagree	Neutral		Disagree to some extent	Agree to some extent	Agree to some extent	Agree to some extent	Agree to some extent	Disagree to some extent	Disagree to some extent	Disagree to some extent	Disagree to some extent
Yes	Somewhat agree	Somewhat agree	Somewhat agree	Somewhat agree	Somewhat agree	Strongly agree	Over 75%	41283	41283	Every week		Never		Every week		Every month		Every week		0	3	3	A lot	A lot	All the time	A moderate amount	Disagree	Somewhat agree	Moderately disagree	Disagree	Somewhat agree	Strongly agree	Strongly agree	Strongly agree	Strongly agree	Strongly agree	Disagree	Disagree	Disagree		Disagree to some extent	Totally disagree	Largely agree	Largely disagree	Disagree to some extent	Disagree to some extent	Agree to some extent	Agree to some extent	Agree to some extent
Yes	Somewhat agree	Strongly agree	Somewhat agree	Neutral	Somewhat agree	Somewhat agree	51-75%	41283	41283	Every other day		Every month		Every other day		Every week		Every other day		2	6	2	Moderately	Moderately	Frequently	A moderate amount	Neutral	Somewhat agree	Somewhat agree	Neutral	Somewhat agree	Somewhat agree	Moderately agree	Moderately agree	Moderately agree	Moderately agree	Disagree	Disagree	Disagree		Disagree to some extent	Agree to some extent	Disagree to some extent	Disagree to some extent	Agree to some extent	Agree to some extent	Agree to some extent	Largely disagree	Largely disagree
Yes	Strongly agree	Neutral	Somewhat agree	Moderately disagree	Neutral	Somewhat agree	Under 25%	0	41283	Every other day		Every week		Every week		Never		Never		0	1	1	A little	A little	Never	A lot	Somewhat disagree	Neutral	Somewhat agree	Somewhat agree	Somewhat agree	Somewhat agree	Somewhat agree	Neutral	Somewhat agree	Disagree	Somewhat disagree	Disagree	Moderately agree	There is next to zero good evidence for things chiropractors do. Looking up "evidence" often leads to "more evidence is required" and thus not helpful. I trust that what i have been taught in school is the best we have (it better be, it cost me $100,000), I go with that. Please stop wasting time and money on stupid studies like the one I am doing right now, and start doing actual research that he…	Agree to some extent	Largely disagree	Agree to some extent	Agree to some extent	Largely disagree	Agree to some extent	Largely agree	Agree to some extent	Agree to some extent
Yes	Somewhat agree	Strongly agree	Neutral	Somewhat agree	Somewhat agree	Moderately agree	51-75%	41283	21-50	Every other day		Every month		Every other day		Every week		Never		2	5	3	A lot	A lot	Frequently	Some	Moderately disagree	Disagree	Somewhat agree	Moderately disagree	Somewhat agree	Strongly agree	Strongly agree	Moderately agree	Moderately agree	Moderately agree	Disagree	Disagree	Disagree		Disagree to some extent	Agree to some extent	Disagree to some extent	Agree to some extent	Largely disagree	Disagree to some extent	Disagree to some extent	Largely disagree	Largely agree
Yes	Strongly agree	Strongly agree	Moderately agree	Strongly agree	Strongly agree	Strongly agree	Over 75%		41283	Every other day		Every week		Every other day		Every month		Every month		1	5	5	Completely	Completely	Regularly	A lot	Moderately disagree	Strongly agree	Disagree	Moderately disagree	Moderately disagree	Strongly agree	Disagree	Strongly agree	Strongly agree	Disagree	Disagree	Disagree	Disagree		Agree to some extent	Disagree to some extent	Disagree to some extent	Largely disagree	Largely disagree	Disagree to some extent	Largely disagree	Disagree to some extent	Disagree to some extent
Yes	Strongly agree	Strongly agree	Moderately agree	Strongly agree	Neutral	Moderately agree	Over 75%	41283	41283	Every week		Every week		Every week		Every month		Never		4	4	4	A lot	A lot	Occasionally	A moderate amount	Moderately disagree	Neutral	Moderately disagree	Moderately disagree	Somewhat agree	Strongly agree	Moderately agree	Moderately agree	Moderately agree	Disagree	Disagree	Disagree	Disagree		Disagree to some extent	Agree to some extent	Agree to some extent	Largely agree	Disagree to some extent	Agree to some extent	Largely agree	Largely disagree	Agree to some extent
Yes	Somewhat agree	Somewhat agree	Somewhat disagree	Moderately disagree	Somewhat disagree	Moderately agree	51-75%	41283	41283	Every month		Never		Every week		Every month		Every month		2	2	2	Somewhat	Moderately	Occasionally	A moderate amount	Somewhat agree	Somewhat agree	Somewhat agree	Somewhat agree	Neutral	Moderately agree	Moderately agree	Somewhat agree	Somewhat agree	Somewhat agree	Somewhat agree	Disagree	Neutral		Largely disagree	Largely disagree	Disagree to some extent	Disagree to some extent	Disagree to some extent	Disagree to some extent	Largely disagree	Disagree to some extent	Disagree to some extent
Yes	Moderately agree	Moderately agree	Moderately agree	Somewhat agree	Moderately agree	Strongly agree	Over 75%	41283	41597	Every day		Other (please specify)	I do almost all my research online including pdf/online textbooks, everyday	Every day		Every month		Every week		5	5	8	A lot	A lot	Frequently	Some	Moderately disagree	Somewhat agree	Somewhat disagree	Moderately disagree	Somewhat agree	Strongly agree	Moderately agree	Moderately agree	Strongly agree	Moderately agree	Disagree	Disagree	Disagree		Totally disagree	Disagree to some extent	Agree to some extent	Largely agree	Largely disagree	Largely disagree	Agree to some extent	Agree to some extent	Largely agree
Yes	Moderately agree	Strongly agree	Moderately disagree	Moderately agree	Strongly agree	Moderately agree	51-75%	41283	41283	Every week		Never		Every other day		Every month		Never		0	3	3	A lot	Moderately	Occasionally	A little	Moderately disagree	Neutral	Somewhat disagree	Disagree	Somewhat disagree	Strongly agree	Strongly agree	Moderately agree	Moderately agree	Moderately agree	Moderately disagree	Disagree	Disagree		Largely agree	Largely agree	Largely agree	Largely agree	Agree to some extent	Disagree to some extent	Largely agree	Agree to some extent	Largely disagree
Yes	Strongly agree	Somewhat agree	Somewhat disagree	Somewhat agree	Moderately agree	Strongly agree	26-50%	0	41283	Other (please specify)	every couple of weeks	Never		Every month		Other (please specify)	highly variable: can be a few times in one month and then nothing for 3-5 months	Other (please specify)	a few times a year	0	0	0	Moderately	Somewhat	Occasionally	A moderate amount	Disagree	Somewhat agree	Somewhat disagree	Moderately disagree	Neutral	Strongly agree	Somewhat agree	Somewhat agree	Neutral	Neutral	Somewhat agree	Somewhat disagree	Disagree		Largely disagree	Largely disagree	Agree to some extent	Disagree to some extent	Largely disagree	Largely disagree	Largely disagree	Disagree to some extent	Disagree to some extent
Yes	Neutral	Somewhat disagree	Neutral	Somewhat agree	Somewhat agree	Moderately agree	26-50%	41283	41283	Every month		Never		Every month		Every month		Never		0	1	1	Moderately	A little	Occasionally	A little	Neutral	Moderately disagree	Somewhat disagree	Somewhat disagree	Somewhat disagree	Somewhat agree	Somewhat agree	Neutral	Somewhat agree	Somewhat disagree	Neutral	Neutral	Neutral		Agree to some extent	Disagree to some extent	Disagree to some extent	Disagree to some extent	Largely disagree	Largely disagree	Disagree to some extent	Largely disagree	Largely disagree
Yes	Neutral	Moderately agree	Somewhat agree	Moderately agree	Moderately agree	Strongly agree	51-75%	41283	41283	Every week		Never		Every week		Every month		Never		1	2	5	A lot	A lot	Almost never	Some	Neutral	Moderately disagree	Neutral	Somewhat agree	Somewhat disagree	Moderately agree	Moderately agree	Moderately agree	Moderately agree	Moderately agree	Neutral	Somewhat disagree	Neutral		Disagree to some extent	Agree to some extent	Largely agree	Totally agree	Agree to some extent	Agree to some extent	Largely agree	Agree to some extent	Agree to some extent
Yes	Moderately agree	Strongly agree	Moderately agree	Moderately agree	Somewhat agree	Somewhat agree	51-75%	41283	21-50	Every month		Never		Every month		Every month		Never		1	1	0	Completely	Moderately	Occasionally	A little	Somewhat disagree	Moderately disagree	Somewhat agree	Disagree	Disagree	Moderately agree	Strongly agree	Moderately agree	Strongly agree	Somewhat disagree	Somewhat agree	Neutral	Disagree		Largely agree	Disagree to some extent	Agree to some extent	Totally disagree	Agree to some extent	Disagree to some extent	Largely disagree	Disagree to some extent	Disagree to some extent
Yes	Moderately agree	Somewhat agree	Somewhat agree	Moderately agree	Moderately agree	Moderately agree	51-75%	41283	41283	Every month		Other (please specify)	every other month	Every month		Every month		Every month		0	1	1	Moderately	A little	Occasionally	A lot	Moderately disagree	Somewhat agree	Somewhat disagree	Moderately disagree	Somewhat agree	Moderately agree	Moderately disagree	Somewhat agree	Moderately agree	Moderately disagree	Disagree	Disagree	Neutral		Largely disagree	Largely disagree	Disagree to some extent	Agree to some extent	Largely disagree	Agree to some extent	Largely disagree	Largely agree	Agree to some extent
Yes	Moderately agree	Strongly agree	Moderately agree	Somewhat agree	Moderately agree	Strongly agree	26-50%	41283	41283	Every week		Never		Never		Every week		Never		2	2	1	Moderately	A lot	Occasionally	A moderate amount	Somewhat agree	Moderately agree	Somewhat disagree	Disagree	Somewhat agree	Strongly agree	Moderately agree	Moderately agree	Moderately agree	Disagree	Moderately disagree	Moderately disagree	Disagree		Largely disagree	Totally disagree	Totally disagree	Agree to some extent	Totally disagree	Totally disagree	Disagree to some extent	Largely agree	Largely disagree
Yes	Somewhat agree	Somewhat agree	Moderately agree	Somewhat agree	Somewhat agree	Neutral	51-75%	41283	41283	Every month		Other (please specify)	only if needed	Every month		Every month		Never		1	2	2	Somewhat	Somewhat	Occasionally	Some	Somewhat disagree	Somewhat disagree	Somewhat agree	Somewhat agree	Somewhat agree	Neutral	Somewhat agree	Neutral	Neutral	Somewhat agree	Somewhat agree	Somewhat agree	Neutral		Agree to some extent	Agree to some extent	Disagree to some extent	Disagree to some extent	Disagree to some extent	Disagree to some extent	Largely agree	Agree to some extent	Agree to some extent
Yes	Moderately agree	Moderately agree	Moderately agree	Moderately agree	Moderately agree	Moderately agree	26-50%	41283	41597	Every week				Every week		Every week				2	3	2	Moderately	Somewhat	Occasionally	A moderate amount	Somewhat agree	Somewhat agree	Moderately agree	Moderately agree	Moderately agree	Moderately agree	Somewhat agree	Moderately agree	Moderately agree	Somewhat disagree	Disagree	Moderately disagree	Somewhat disagree		Largely agree	Largely agree	Agree to some extent	Agree to some extent	Agree to some extent	Disagree to some extent	Largely agree	Largely agree	Agree to some extent
Yes	Somewhat agree	Somewhat agree	Somewhat agree	Neutral	Somewhat agree	Somewhat agree	51-75%	41283	41283	Every month		Every month		Every week		Every month		Never		0	2	1	Moderately	Moderately	Occasionally	A moderate amount	Neutral	Moderately agree	Neutral	Neutral	Neutral	Somewhat agree	Moderately agree	Somewhat agree	Somewhat agree	Somewhat agree	Somewhat disagree	Somewhat disagree	Neutral		Agree to some extent	Agree to some extent	Agree to some extent	Disagree to some extent	Agree to some extent	Agree to some extent	Agree to some extent	Agree to some extent	Agree to some extent
Yes	Moderately agree	Moderately agree	Somewhat agree	Moderately disagree	Moderately disagree	Somewhat agree	51-75%	41283	41283	Every week		Other (please specify)	When needed	Every month		Never		Every month		0	3	2	A lot	Moderately	Occasionally	A moderate amount	Neutral	Somewhat agree	Somewhat disagree	Neutral	Somewhat agree	Somewhat agree	Neutral	Somewhat agree	Moderately agree	Moderately agree	Somewhat disagree	Moderately disagree	Moderately disagree		Disagree to some extent	Largely disagree	Largely agree	Agree to some extent	Largely disagree	Agree to some extent	Largely agree	Largely disagree	Largely disagree
[truncated: 119 more columns]
